# Supplementary material for: Simple Psychological Interventions for Reducing Pain From Common Needle Procedures in Adults: Systematic Review of Randomized and Quasi-Randomized Controlled Trials
Source: PubMed Central journal article supplement — Clin J Pain. 2015 Sep 17;31(Suppl 10):S90–8. doi: 10.1097/AJP.0000000000000270 (PMC4900414; doi:10.1097/ajp.0000000000000270), 2015-09-17

## Revman Plots: Verbal signal about procedure

### Pain

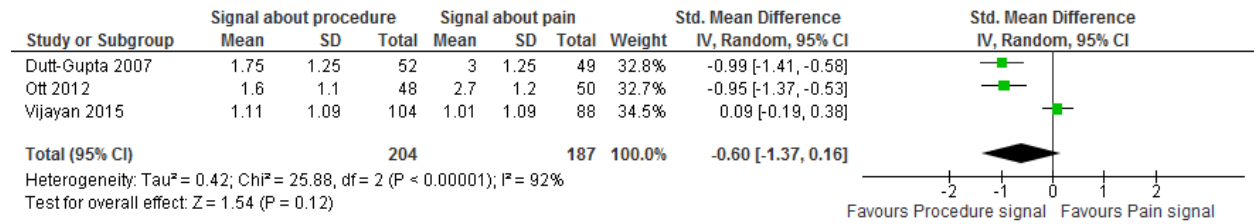

(without data from study by Vijayan 2015)

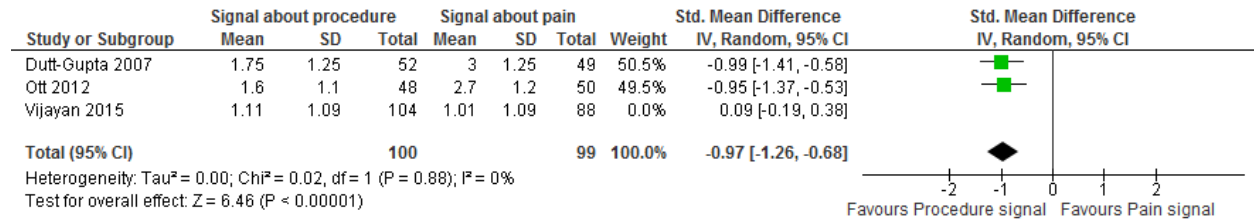

### Pain (yes/no)

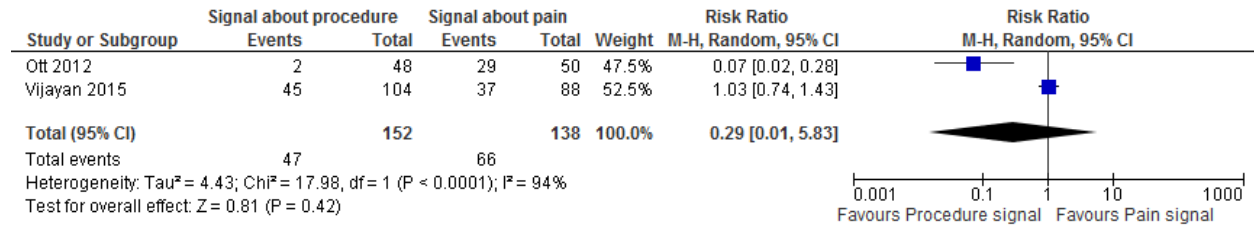

### Distress (yes/no) withdrawal of arm

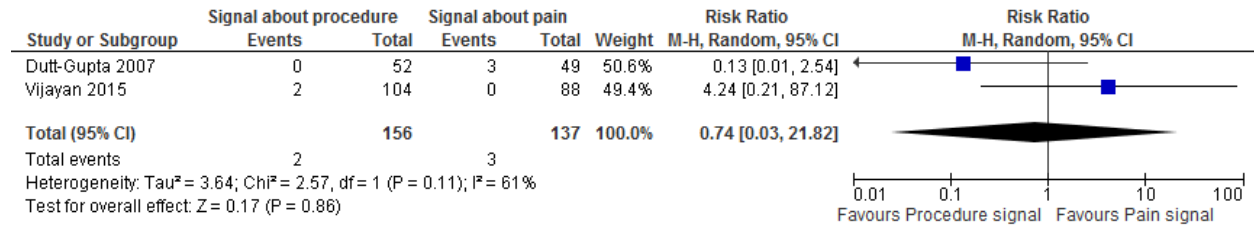

### Distress (yes/no) patient vocalization

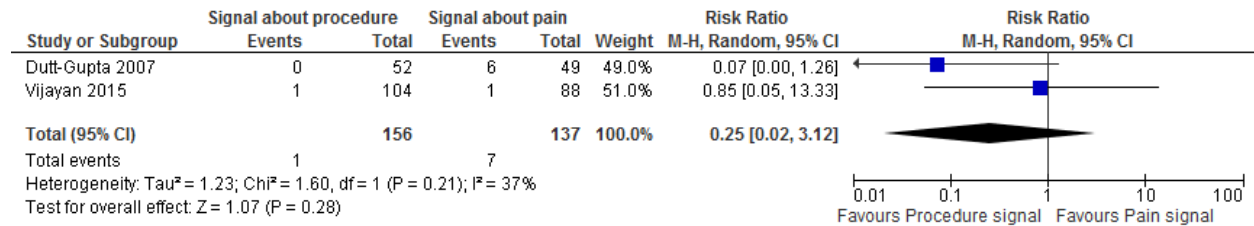

Supplement: ajp-31-s90-s001.pdf [file ajp-31-s90-s001.pdf]
