# Supplementary material for: Simple Psychological Interventions for Reducing Pain From Common Needle Procedures in Adults: Systematic Review of Randomized and Quasi-Randomized Controlled Trials
Source: PubMed Central journal article supplement — Clin J Pain. 2015 Sep 17;31(Suppl 10):S90–8. doi: 10.1097/AJP.0000000000000270 (PMC4900414; doi:10.1097/ajp.0000000000000270), 2015-09-17
Supplement: ajp-31-s90-s005.pdf [file ajp-31-s90-s005.pdf]

**Author(s):** KEB/AT/CMM/MN

**Date:** 2015-04-23

**Question:** Should providing a verbal signal of an impending procedure vs a verbal signal of impending pain be used for by clinicians reducing vaccine injection pain in individuals of all ages?<sup>1,2,3,4</sup>

**Settings:** medical university, phlebotomy clinic, hospital

**Bibliography:** Dutt-Gupta 2007, Ott 2012, Vijayan 2015

| Quality assessment                                                                                                                        |                   |                      |                                       |                      |                      |                      | No of patients                                      |                                   | Effect                               |                                                        | Quality          | Importance |
|-------------------------------------------------------------------------------------------------------------------------------------------|-------------------|----------------------|---------------------------------------|----------------------|----------------------|----------------------|-----------------------------------------------------|-----------------------------------|--------------------------------------|--------------------------------------------------------|------------------|------------|
| No of studies                                                                                                                             | Design            | Risk of bias         | Inconsistency                         | Indirectness         | Imprecision          | Other considerations | Providing a verbal signal of an impending procedure | A verbal signal of impending pain | Relative (95% CI)                    | Absolute                                               |                  |            |
| <b>Pain<sup>5</sup> (measured with: validated tool (Numerical Rating Scale 0-10, Likert scale 1-5); Better indicated by lower values)</b> |                   |                      |                                       |                      |                      |                      |                                                     |                                   |                                      |                                                        |                  |            |
| 3                                                                                                                                         | randomised trials | serious <sup>6</sup> | no serious inconsistency <sup>7</sup> | serious <sup>8</sup> | serious <sup>9</sup> | none                 | 204                                                 | 187                               | -                                    | SMD 0.6 lower (1.37 lower to 0.16 higher) <sup>5</sup> | ⊕○○○<br>VERY LOW | CRITICAL   |
| <b>Pain (yes/no) (assessed with: validated tool (Numerical Rating Scale, Likert scale, pain yes/no))</b>                                  |                   |                      |                                       |                      |                      |                      |                                                     |                                   |                                      |                                                        |                  |            |
| 2                                                                                                                                         | randomised trials | serious <sup>6</sup> | no serious inconsistency <sup>7</sup> | serious <sup>8</sup> | serious <sup>9</sup> | none                 | 47/152 (30.9%)                                      | 66/138 (47.8%)                    | RR 0.29 (0.01 to 5.83) <sup>10</sup> | 340 fewer per 1000 (from 473 fewer to 1000 more)       | ⊕○○○<br>VERY LOW | CRITICAL   |
|                                                                                                                                           |                   |                      |                                       |                      |                      |                      |                                                     | 0%                                |                                      | -                                                      |                  |            |
| <b>Distress (yes/no) patient withdrawal of arm (assessed with: observation of patient withdrawal of arm)</b>                              |                   |                      |                                       |                      |                      |                      |                                                     |                                   |                                      |                                                        |                  |            |
| 2                                                                                                                                         | randomised trials | serious <sup>6</sup> | no serious inconsistency              | serious <sup>8</sup> | serious <sup>9</sup> | none                 | 2/156 (1.3%)                                        | 3/137 (2.2%)                      | RR 0.74 (0.03 to 21.82)              | 6 fewer per 1000 (from 21 fewer to 456 more)           | ⊕○○○<br>VERY LOW | IMPORTANT  |
|                                                                                                                                           |                   |                      |                                       |                      |                      |                      |                                                     | 0%                                |                                      | -                                                      |                  |            |
| <b>Distress (yes/no) patient vocalization (assessed with: observation of patient vocalization)</b>                                        |                   |                      |                                       |                      |                      |                      |                                                     |                                   |                                      |                                                        |                  |            |
| 2                                                                                                                                         | randomised trials | serious <sup>6</sup> | no serious inconsistency              | serious <sup>8</sup> | serious <sup>9</sup> | none                 | 1/156 (0.64%)                                       | 7/137 (5.1%)                      | RR 0.25 (0.02 to                     | 38 fewer per 1000 (from 50 fewer to 108                | ⊕○○○<br>VERY     | IMPORTANT  |

|                                                                                                                                                                    |                       |  |  |  |  |      |   |    |       |       |     |           |
|--------------------------------------------------------------------------------------------------------------------------------------------------------------------|-----------------------|--|--|--|--|------|---|----|-------|-------|-----|-----------|
|                                                                                                                                                                    |                       |  |  |  |  |      |   |    | 3.12) | more) | LOW |           |
|                                                                                                                                                                    |                       |  |  |  |  |      |   | 0% |       | -     |     |           |
| <b>Fear (assessed with: no data were identified for this critically important outcome)</b>                                                                         |                       |  |  |  |  |      |   |    |       |       |     |           |
| 0                                                                                                                                                                  | No evidence available |  |  |  |  | none | - | -  | -     | -     |     | CRITICAL  |
|                                                                                                                                                                    |                       |  |  |  |  |      |   | 0% |       | -     |     |           |
| <b>Procedure Outcomes, Parent Fear, Vaccine Compliance, Memory, Preference, Satisfaction (assessed with: no data were identified for these important outcomes)</b> |                       |  |  |  |  |      |   |    |       |       |     |           |
| 0                                                                                                                                                                  | No evidence available |  |  |  |  | none | - | -  | -     | -     |     | IMPORTANT |
|                                                                                                                                                                    |                       |  |  |  |  |      |   | 0% |       | -     |     |           |

<sup>1</sup> Study by Dutt-Gupta (2007) compared signal "I am going to apply the tourniquet on the arm. As I do this many people find the arm becomes heavy, numb and tingly. This allows the drip to be placed more comfortably" to "I am going to apply the tourniquet and insert the needle in a few moments. It's a sharp scratch and it may sting a little."

<sup>2</sup> Study by Ott (2013) compared signal "Beware, I am about to start" to "This will sting."

<sup>3</sup> Study by Vijayan (2015) compared signal "Ready" to "Sharp scratch",

<sup>4</sup> Study by Dutt-Gupta (2007) excluded individuals with a history of difficult previous venous access. Study by Ott (2012) excluded individuals with an extreme fear of pain or blood sampling.

<sup>5</sup> Removal of the data from the study with lower pain scores (Vijayan 2015) alters the meta analytic results: pain scores are statistically lower for the verbal signaling group (SMD -0.97 (95% CI -1.26, -0.68)).

<sup>6</sup> Operator not blinded; participant blinded

<sup>7</sup> Heterogeneity can be explained by differences in participants (volunteers vs patients), settings, and verbal interventions

<sup>8</sup> Context is venipuncture/venous cannulation

<sup>9</sup> Confidence interval crosses the line of nonsignificance and sample size was below the recommended optimum information size (OIS) of 400 for an effect size of 0.2

<sup>10</sup> Pain defined as a numerical rating scale score or likert rating of > 1
