# Supplementary material for: Simple Psychological Interventions for Reducing Pain From Common Needle Procedures in Adults: Systematic Review of Randomized and Quasi-Randomized Controlled Trials
Source: PubMed Central journal article supplement — Clin J Pain. 2015 Sep 17;31(Suppl 10):S90–8. doi: 10.1097/AJP.0000000000000270 (PMC4900414; doi:10.1097/ajp.0000000000000270), 2015-09-17
Supplement: ajp-31-s90-s006.pdf [file ajp-31-s90-s006.pdf]

**Author(s):** KEB/KAB/JP/AT

**Date:** 2015-03-09

**Question:** Should music distraction vs no treatment be used for reducing vaccine injection pain in adults?<sup>1,2</sup>

**Settings:** hospital, clinics

**Bibliography:** Jacobson 1999, Jacobson 2006 (1,4)

| Quality assessment                                                                                                                                                                   |                       |                      |                          |                      |                      |                      | No of patients    |              | Effect            |                                                           | Quality          | Importance |
|--------------------------------------------------------------------------------------------------------------------------------------------------------------------------------------|-----------------------|----------------------|--------------------------|----------------------|----------------------|----------------------|-------------------|--------------|-------------------|-----------------------------------------------------------|------------------|------------|
| No of studies                                                                                                                                                                        | Design                | Risk of bias         | Inconsistency            | Indirectness         | Imprecision          | Other considerations | Music distraction | No treatment | Relative (95% CI) | Absolute                                                  |                  |            |
| <b>Pain<sup>3,4</sup> (measured with: validated tool (Visual Analog Scale 0-100, Numerical Rating Scale 0-10); Better indicated by lower values)</b>                                 |                       |                      |                          |                      |                      |                      |                   |              |                   |                                                           |                  |            |
| 2                                                                                                                                                                                    | randomised trials     | serious <sup>5</sup> | no serious inconsistency | serious <sup>6</sup> | serious <sup>7</sup> | none                 | 80                | 76           | -                 | SMD 0.10 lower (0.48 lower to 0.27 higher) <sup>3,4</sup> | ⊕000<br>VERY LOW | CRITICAL   |
| <b>Fear<sup>3,4</sup> (measured with: validated tool (Visual Analog Scale 0-100, Numerical Rating Scale 0-10); Better indicated by lower values)</b>                                 |                       |                      |                          |                      |                      |                      |                   |              |                   |                                                           |                  |            |
| 2                                                                                                                                                                                    | randomised trials     | serious <sup>5</sup> | no serious inconsistency | serious <sup>6</sup> | serious <sup>7</sup> | none                 | 80                | 76           | -                 | SMD 0.25 lower (0.61 lower to 0.10 higher) <sup>3,4</sup> | ⊕000<br>VERY LOW | CRITICAL   |
| <b>Distress, Procedure Outcomes, Use of intervention, Vaccine Compliance, Memory, Preference, Satisfaction (assessed with: no data were identified for these important outcomes)</b> |                       |                      |                          |                      |                      |                      |                   |              |                   |                                                           |                  |            |
| 0                                                                                                                                                                                    | No evidence available |                      |                          |                      |                      | none                 | -                 | -            | -                 | -                                                         |                  | IMPORTANT  |
|                                                                                                                                                                                      |                       |                      |                          |                      |                      |                      |                   | 0%           |                   | -                                                         |                  |            |

<sup>1</sup> In included studies (Jacobson 1999, 2006), participants selected their own music distraction

<sup>2</sup> Study by Jacobson (1999) includes patients needing intravenous therapy. Study by Jacobson (2006) includes same day surgery patients.

<sup>3</sup> Additional data and study details provided by author (Jacobson 2006)

<sup>4</sup> In Jacobsen 2006, analysis (1) includes males and analysis (4) includes females.

<sup>5</sup> Operator not blinded, participants not blinded; outcome assessor not blinded

<sup>6</sup> Context is venipuncture/venous cannulation

<sup>7</sup> Confidence intervals cross the line of nonsignificance and the sample size was below the recommended optimum information size (OIS) of 400 for an effect size of 0.2
