# Supplementary material for: Simple Psychological Interventions for Reducing Pain From Common Needle Procedures in Adults: Systematic Review of Randomized and Quasi-Randomized Controlled Trials
Source: PubMed Central journal article supplement — Clin J Pain. 2015 Sep 17;31(Suppl 10):S90–8. doi: 10.1097/AJP.0000000000000270 (PMC4900414; doi:10.1097/ajp.0000000000000270), 2015-09-17
Supplement: ajp-31-s90-s007.pdf [file ajp-31-s90-s007.pdf]

**Author(s):** KEB/KAB/JP/AT

**Date:** 2015-03-09

**Question:** Should visual distraction vs no treatment be used for reducing vaccine injection pain in adults?<sup>1,2</sup>

**Settings:** hospital, clinic

**Bibliography:** Cason 1997, Jacobson 2006 (2,5)

| Quality assessment                                                                                                                                                                                           |                       |                      |                                       |                      |                      |                      | No of patients     |              | Effect            |                                                           | Quality          | Importance |
|--------------------------------------------------------------------------------------------------------------------------------------------------------------------------------------------------------------|-----------------------|----------------------|---------------------------------------|----------------------|----------------------|----------------------|--------------------|--------------|-------------------|-----------------------------------------------------------|------------------|------------|
| No of studies                                                                                                                                                                                                | Design                | Risk of bias         | Inconsistency                         | Indirectness         | Imprecision          | Other considerations | Visual distraction | No treatment | Relative (95% CI) | Absolute                                                  |                  |            |
| <b>Pain<sup>3,4</sup> (measured with: validated tool (Visual Analog Scale 0-100, Numerical Rating Scale 0-10, Wong Baker Faces Scale 0-5, Present Pain Intensity 0-5); Better indicated by lower values)</b> |                       |                      |                                       |                      |                      |                      |                    |              |                   |                                                           |                  |            |
| 2                                                                                                                                                                                                            | randomised trials     | serious <sup>5</sup> | no serious inconsistency <sup>6</sup> | serious <sup>7</sup> | serious <sup>8</sup> | none                 | 86                 | 91           | -                 | SMD 0.57 lower (1.82 lower to 0.68 higher) <sup>3,4</sup> | ⊕○○○<br>VERY LOW | CRITICAL   |
| <b>Fear<sup>3,4</sup> (measured with: validated tools (Numerical Rating Scale 0-10); Better indicated by lower values)</b>                                                                                   |                       |                      |                                       |                      |                      |                      |                    |              |                   |                                                           |                  |            |
| 1                                                                                                                                                                                                            | randomised trials     | serious <sup>5</sup> | no serious inconsistency              | serious <sup>7</sup> | serious <sup>8</sup> | none                 | 41                 | 40           | -                 | SMD 0.05 lower (0.50 lower to 0.40 higher) <sup>3,4</sup> | ⊕○○○<br>VERY LOW | CRITICAL   |
| <b>Distress, Procedure Outcomes, Use of Intervention, Vaccine Compliance, Memory, Preference, Satisfaction (assessed with: no data were identified for these important outcomes)</b>                         |                       |                      |                                       |                      |                      |                      |                    |              |                   |                                                           |                  |            |
| 0                                                                                                                                                                                                            | No evidence available |                      |                                       |                      |                      | none                 | -                  | -            | -                 | -                                                         |                  | IMPORTANT  |
|                                                                                                                                                                                                              |                       |                      |                                       |                      |                      |                      |                    | 0%           |                   | -                                                         |                  |            |

<sup>1</sup> In included studies (Cason 1997, Jacobson 2006), participants used a kaleidoscope for distraction.

<sup>2</sup> Study by Cason (1997) includes outpatients requiring phlebotomy. Study by Jacobson (2006) includes same day surgery patients.

<sup>3</sup> Additional data and study details provided by author (Jacobson 2006)

<sup>4</sup> In Jacobsen 2006, analysis (2) includes males and analysis (5) includes females.

<sup>5</sup> Operator not blinded; participant not blinded; outcome assessor not blinded

<sup>6</sup> Heterogeneity can be explained by differences in settings and patients. In addition, in Jacobson 2006, analyses were separated according to sex.

<sup>7</sup> Context is venipuncture/venous cannulation.

<sup>8</sup> Confidence intervals cross the line of nonsignificance and the sample size was below the recommended optimum information size (OIS) of 400 for an effect size of 0.2
