# Supplementary material for: Simple Psychological Interventions for Reducing Pain From Common Needle Procedures in Adults: Systematic Review of Randomized and Quasi-Randomized Controlled Trials
Source: PubMed Central journal article supplement — Clin J Pain. 2015 Sep 17;31(Suppl 10):S90–8. doi: 10.1097/AJP.0000000000000270 (PMC4900414; doi:10.1097/ajp.0000000000000270), 2015-09-17
Supplement: ajp-31-s90-s008.pdf [file ajp-31-s90-s008.pdf]

**Author(s):** KEB/KAB/JP/AT

**Date:** 2015-03-23

**Question:** Should a breathing intervention (cough, breath-hold) vs no treatment be used for reducing vaccine injection pain in adults?<sup>1,2</sup>

**Settings:** hospital, clinic

**Bibliography:** Basaranoglu 2006, Usichenko 2004

| Quality assessment                                                                                                                                                                   |                                      |                      |                          |                        |                      |                      | No of patients           |              | Effect            |                                     | Quality          | Importance |
|--------------------------------------------------------------------------------------------------------------------------------------------------------------------------------------|--------------------------------------|----------------------|--------------------------|------------------------|----------------------|----------------------|--------------------------|--------------|-------------------|-------------------------------------|------------------|------------|
| No of studies                                                                                                                                                                        | Design                               | Risk of bias         | Inconsistency            | Indirectness           | Imprecision          | Other considerations | A breathing intervention | No treatment | Relative (95% CI) | Absolute                            |                  |            |
| <b>Pain (measured with: validated tool (Visual Analog Scale 0-10, Numerical Rating Scale 0-10); Better indicated by lower values)</b>                                                |                                      |                      |                          |                        |                      |                      |                          |              |                   |                                     |                  |            |
| 2                                                                                                                                                                                    | randomised trials <sup>1,2,3,4</sup> | serious <sup>5</sup> | no serious inconsistency | serious <sup>3,6</sup> | serious <sup>7</sup> | none                 | 69                       | 69           | -                 | SMD 0.82 lower (1.21 to 0.43 lower) | ⊕000<br>VERY LOW | CRITICAL   |
| <b>Fear (assessed with: no data were identified for this critically important outcome)</b>                                                                                           |                                      |                      |                          |                        |                      |                      |                          |              |                   |                                     |                  |            |
| 0                                                                                                                                                                                    | No evidence available                |                      |                          |                        |                      | none                 | -                        | -            | -                 | -                                   |                  | CRITICAL   |
|                                                                                                                                                                                      |                                      |                      |                          |                        |                      |                      |                          | 0%           |                   | -                                   |                  |            |
| <b>Distress, Procedure Outcomes, Use of Intervention, Vaccine Compliance, Memory, Preference, Satisfaction (assessed with: no data were identified for these important outcomes)</b> |                                      |                      |                          |                        |                      |                      |                          |              |                   |                                     |                  |            |
| 0                                                                                                                                                                                    | No evidence available                |                      |                          |                        |                      | none                 | -                        | -            | -                 | -                                   |                  | IMPORTANT  |
|                                                                                                                                                                                      |                                      |                      |                          |                        |                      |                      |                          | 0%           |                   | -                                   |                  |            |

<sup>1</sup> In study by Basaranoglu (2006), participants were asked to perform a deep inspiration and forcefully breath-hold.

<sup>2</sup> In study by Usichenko (2004), participants were asked to cough with moderate intensity without moving their arms.

<sup>3</sup> Study by Usichenko (2004) includes male volunteers. Study by Basaranoglu (2006) includes females undergoing elective surgery.

<sup>4</sup> Study by Usichenko (2004) is a cross-over trial

<sup>5</sup> Operator not blinded; participant not consistently blinded; outcome assessor not consistently blinded

<sup>6</sup> Context is venipuncture/venous cannulation.

<sup>7</sup> Sample size was below the recommended optimum information size (OIS) of 400 for an effect size of 0.2
