# Supplementary figures and images for: Simple Psychological Interventions for Reducing Pain From Common Needle Procedures in Adults: Systematic Review of Randomized and Quasi-Randomized Controlled Trials
Source: PubMed Central journal article supplement — Clin J Pain. 2015 Sep 17;31(Suppl 10):S90–8. doi: 10.1097/AJP.0000000000000270 (PMC4900414; doi:10.1097/ajp.0000000000000270), 2015-09-17

## Revman Plots: Music distraction in adults

### Pain

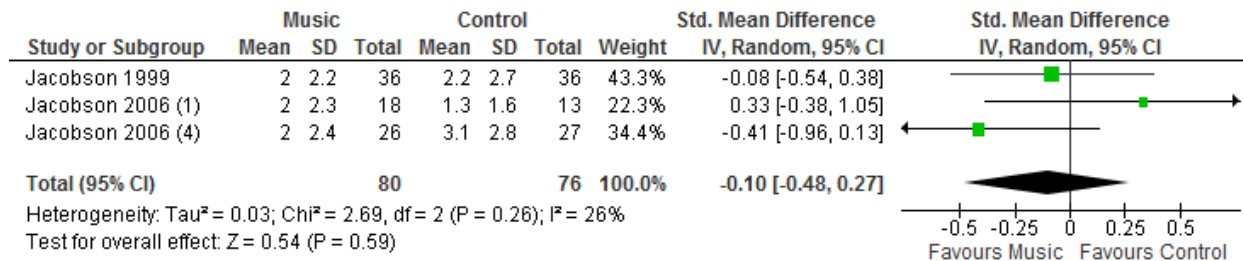

### Fear

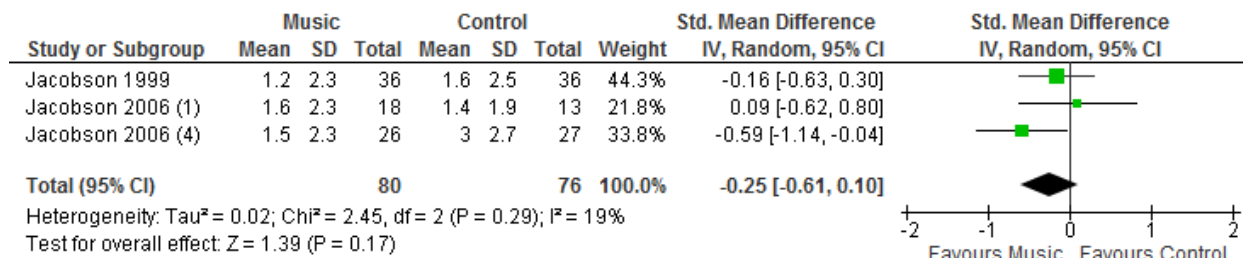

Supplement: ajp-31-s90-s002.pdf [file ajp-31-s90-s002.pdf]

## Revman Plots: Visual distraction in adults

### Pain

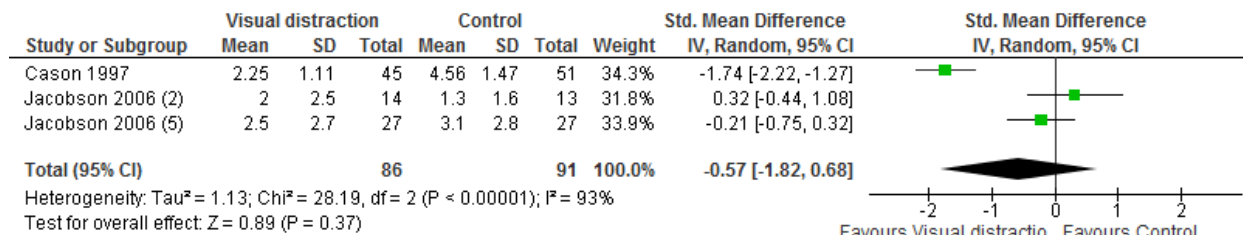

### Fear

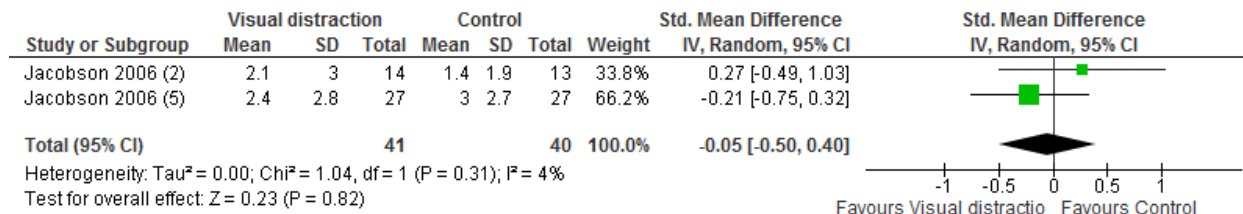

Supplement: ajp-31-s90-s003.pdf [file ajp-31-s90-s003.pdf]

## Revman Plots: Breathing intervention (cough, breath-hold) in adults

### Pain

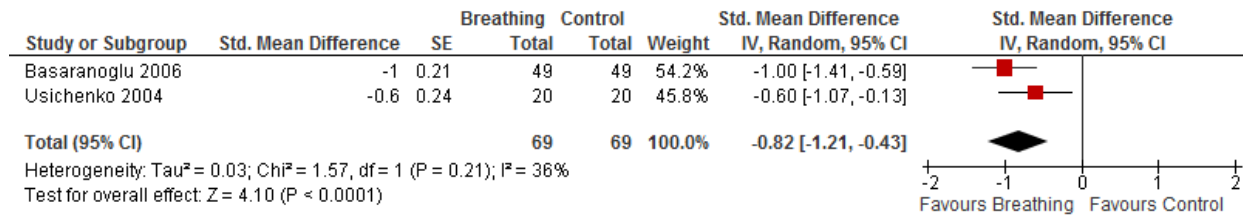

Supplement: ajp-31-s90-s004.pdf [file ajp-31-s90-s004.pdf]
